# Supplementary material
Source: publisher figshare collection journal article supplement (https://acs.figshare.com/ndownloader/files/4556326)

# Supporting Information

## Nanoencapsulation of luminescent 3-hydroxypicolinate lanthanide complexes

Kingsley O. Iwu,<sup>†</sup> Paula C. R. Soares-Santos,<sup>†</sup> Helena I. S. Nogueira,<sup>†</sup>

Luís D. Carlos,<sup>§,\*</sup> Tito Trindade<sup>†,\*</sup>

<sup>†</sup> *Department of Chemistry and CICECO, University of Aveiro, 3810-193 Aveiro, Portugal.*

<sup>§</sup> *Department of Physics and CICECO, University of Aveiro, 3810-193 Aveiro, Portugal.*

**Figure S1.** (a) SEM image and correspondent EDX distribution maps of (b) Eu:Tb, (c) Eu, and (d) Tb, in  $[\text{Eu}_{0.5}\text{Tb}_{0.5}(\text{H}_2\text{O})(\text{picOH})_2(\mu\text{-HpicO})]\cdot 4\text{H}_2\text{O}$  **3**.

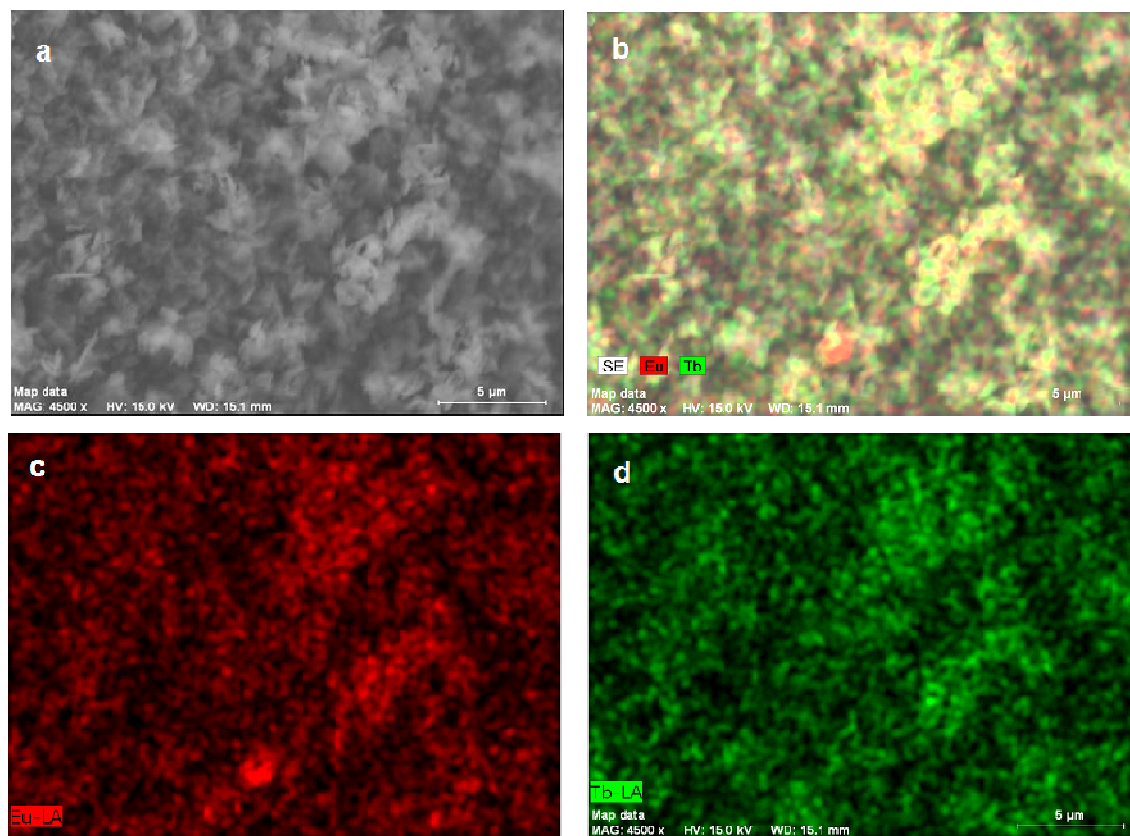

**Figure S2.** (a) SEM image and correspondent EDX distribution maps of (b) Eu:Tb, (c) Eu, and (d) Tb, in  $[\text{Eu}_{0.3}\text{Tb}_{0.7}(\text{H}_2\text{O})(\text{picOH})_2(\mu\text{-HpicO})]\cdot 3\text{H}_2\text{O}$  **4**.

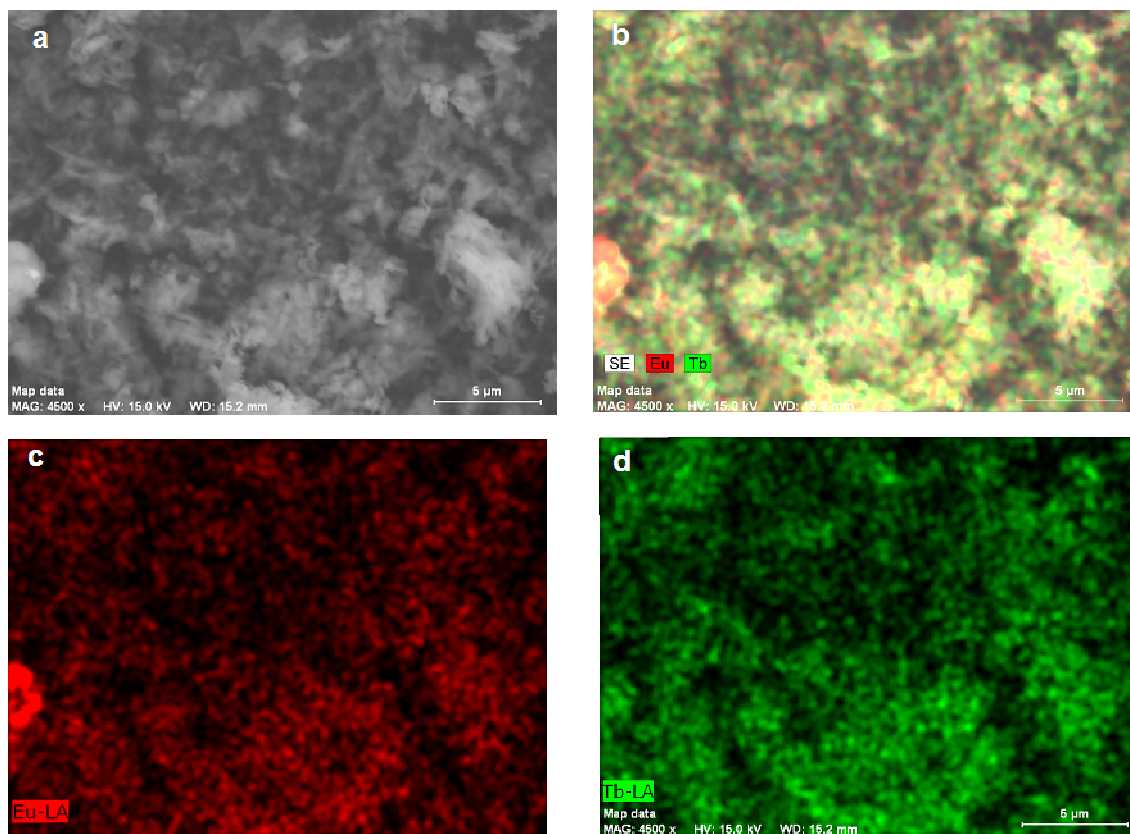

**Figure S3.** (a) SEM image and correspondent EDX distribution maps of (b) Eu:Tb, (c) Eu, and (d) Tb, in  $[\text{Eu}_{0.1}\text{Tb}_{0.9}(\text{H}_2\text{O})(\text{picOH})_2(\mu\text{-HpicO})]\cdot 3\text{H}_2\text{O}$  **5**.

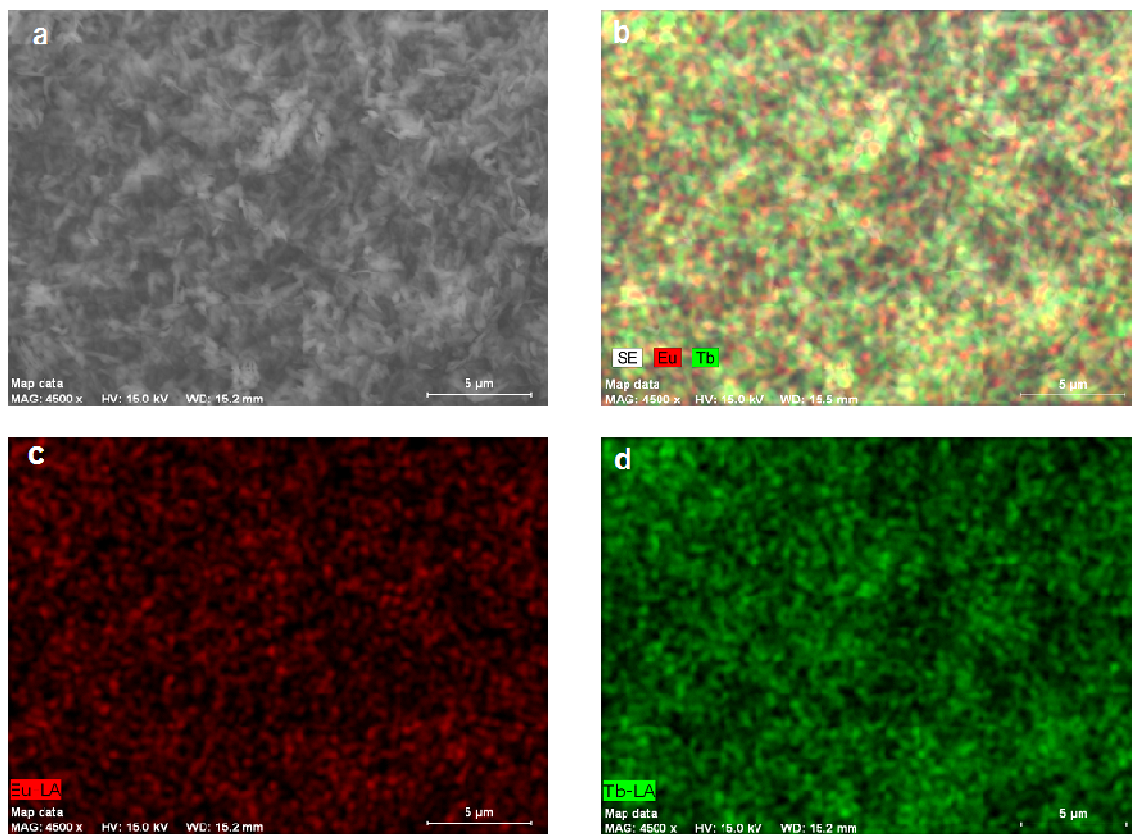

**Figure S4.** (A) Excitation and (B) emission spectra of **2**/SiO<sub>2</sub>-R monitored at 544 nm and excited at 320 nm, respectively, for R = 6 (blue), 8 (red) and 10 (black) together with the emission spectra of **2**/SiO<sub>2</sub>-6 excited at (green) 336 and (magenta) 353 nm.

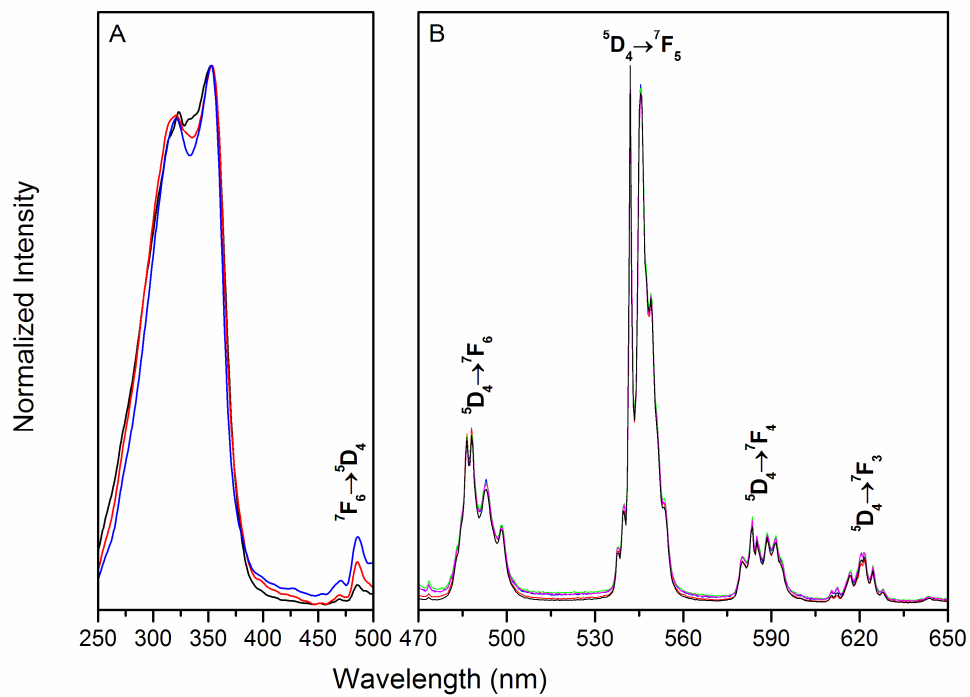

**Figure S5.** Emission spectra of **3-5**/SiO<sub>2</sub>-R (R = 8 and 10) excited at 355-370 nm.

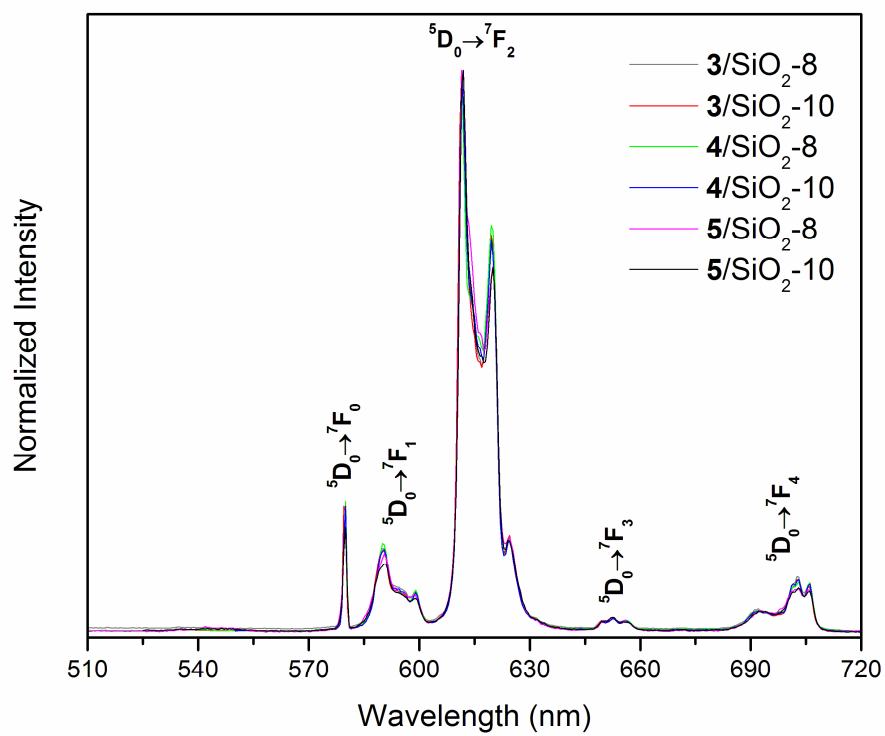

**Figure S6.** (A) Excitation and (B) emission spectra of **6**/SiO<sub>2</sub>-10 (blue), **7**/SiO<sub>2</sub>-10 (red) and **8**/SiO<sub>2</sub>-10 (black), monitored at 620 nm and excited at 353-357 nm, respectively.

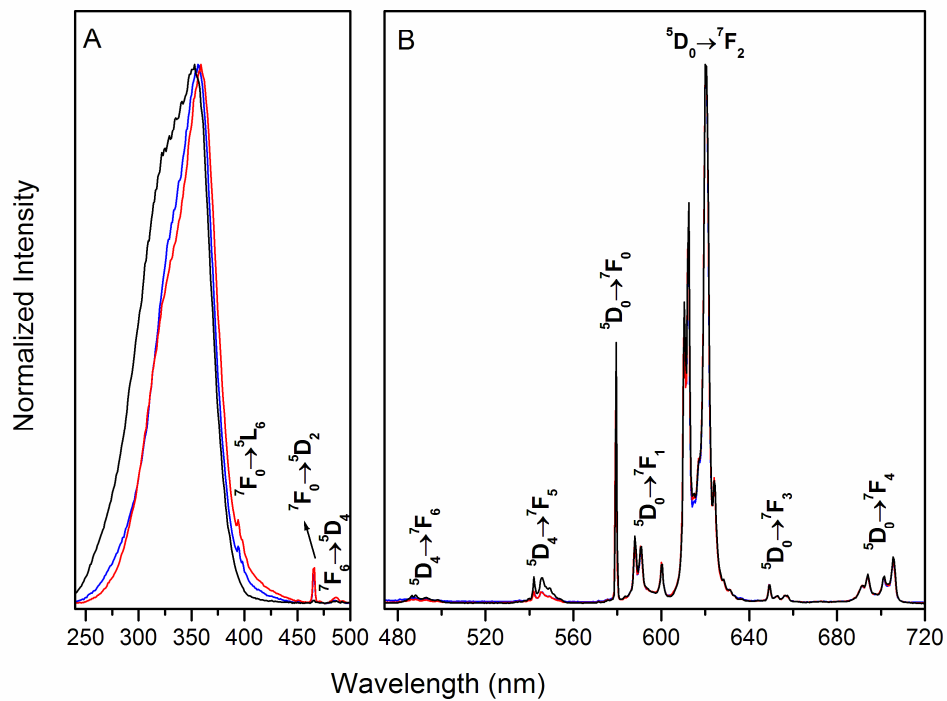

Supplement: Supplementary file 1 [file 4556326]
